# Supplementary material for: Two Distinct Plastid Genome Configurations and Unprecedented Intraspecies Length Variation in the accD Coding Region in Medicago truncatula
Source: PubMed Central journal article supplement (PMC4131835; doi:10.1093/dnares/dsu007), 2014-03-17
Supplement: supp_dsu007_dsu007supp_fig1.pdf [file supp_dsu007_dsu007supp_fig1.pdf]

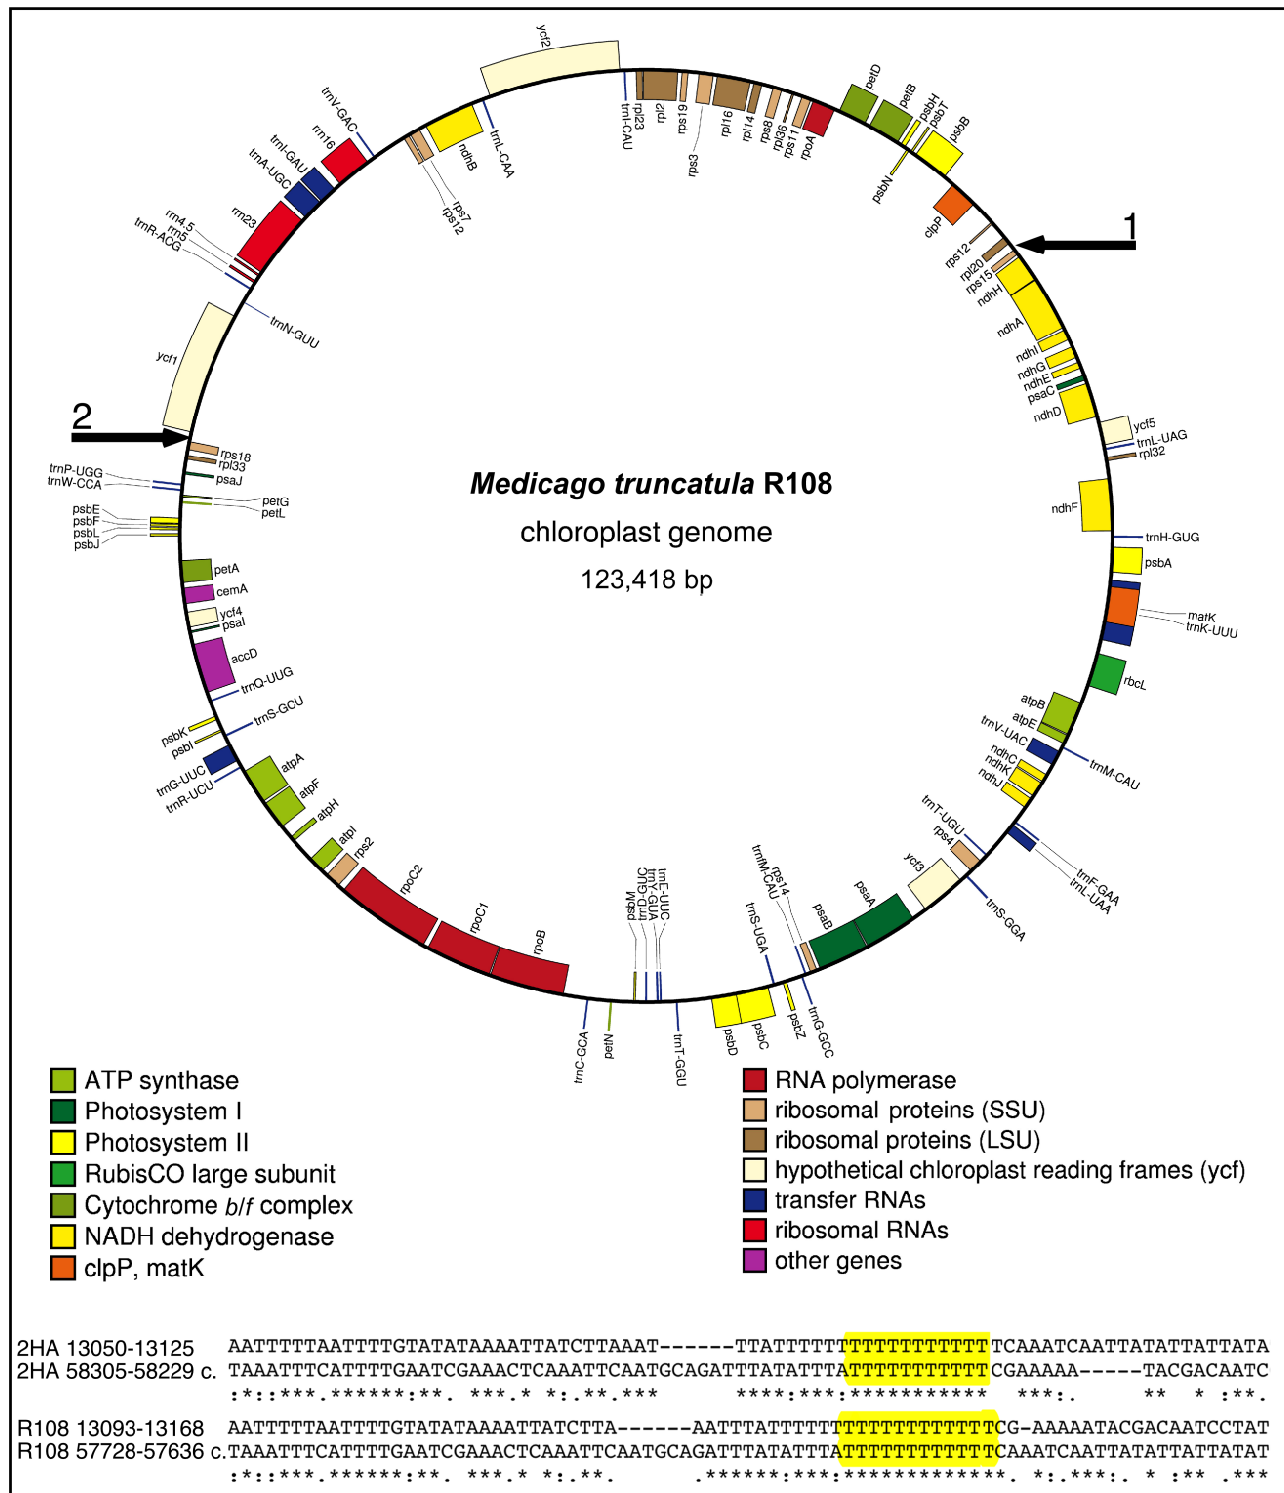

**Supplementary Figure S1.** The circular plastid genome map of *M. truncatula* R108 line created using the OrganellarGenomeDRAW program (Lohse et al. 2013, *Nucleic Acids Res.* **41**, W575-581). Genes shown on the outside of the circle are transcribed in the clockwise direction, and those shown in the inside are transcribed in the counterclockwise direction. Black arrows No. 1 and 2 outside the circle point to the inversion breakpoints in the *rps15-rpl20* and *ycf1-rps18* intergenic regions. Gene order between the arrows in the 2HA, Borung and Paraggio ptDNAs is in the reverse orientation. Below the map are shown the alignments of imperfect repeat sequences flanking the run of Ts (highlighted in yellow) containing the inversion endpoints in the R108 ptDNA and cognate sequences in 2HA.
