# Supplementary material for: Two Distinct Plastid Genome Configurations and Unprecedented Intraspecies Length Variation in the accD Coding Region in Medicago truncatula
Source: PubMed Central journal article supplement (PMC4131835; doi:10.1093/dnares/dsu007), 2014-03-17
Supplement: supp_dsu007_dsu007supp_fig3.pdf [file supp_dsu007_dsu007supp_fig3.pdf]

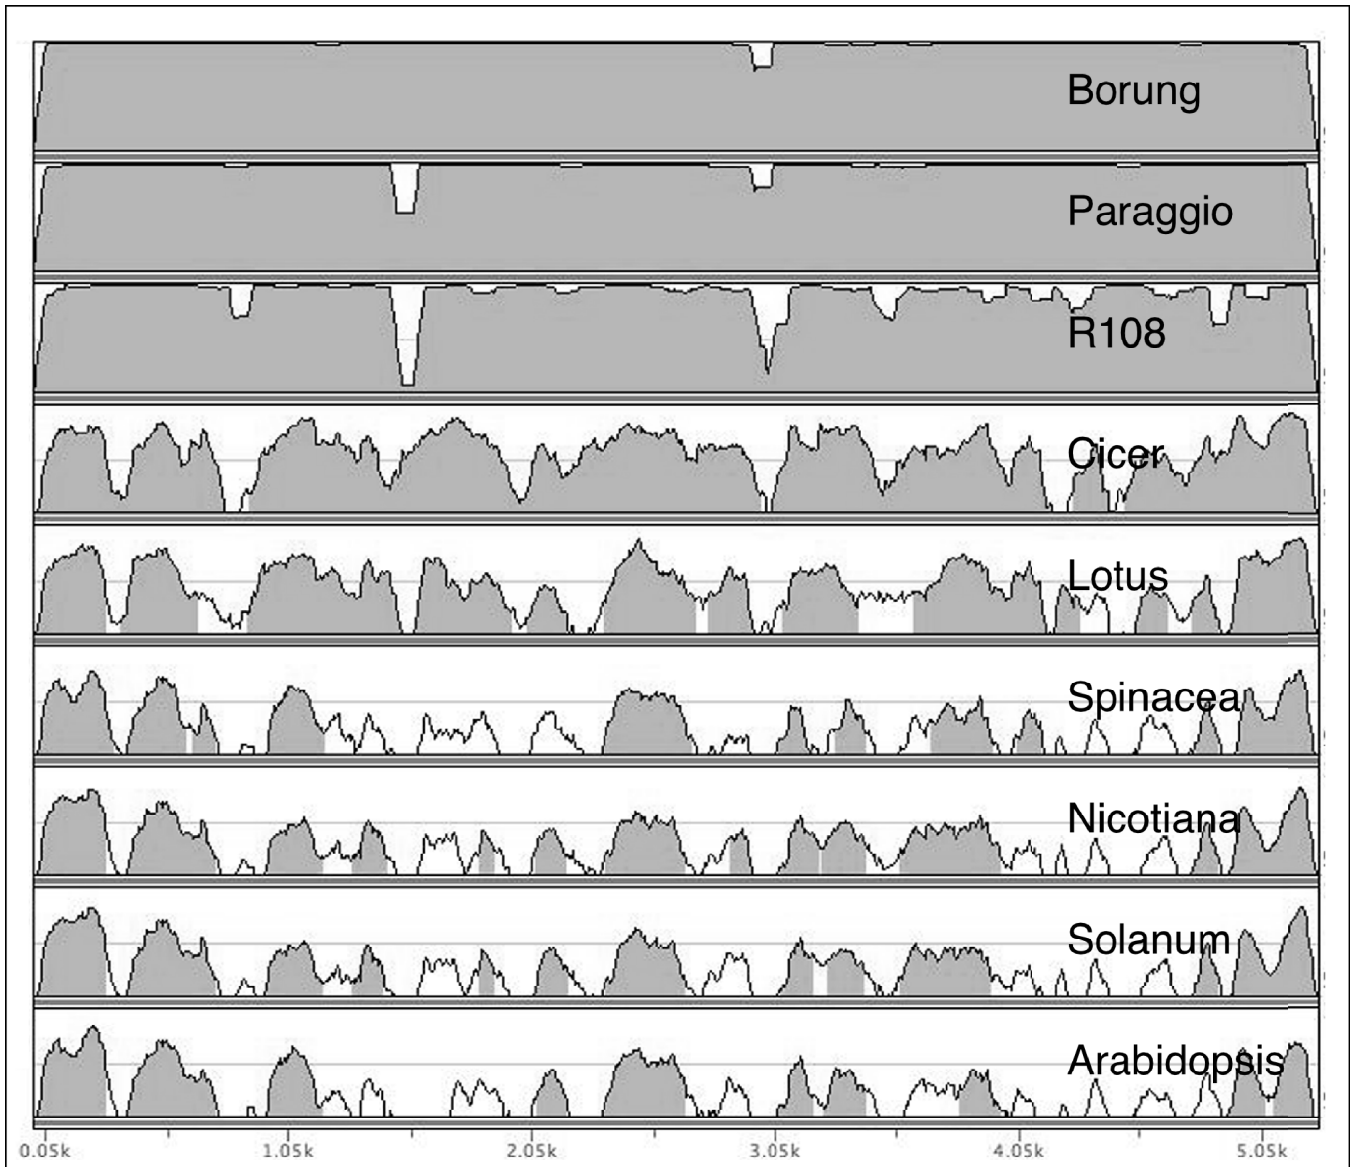

**Supplementary Figure S3.** The *ycf1* mVISTA similarity plot of Borung, Paraggio, R108 and angiosperm species *Cicer arietinum* (NC\_011163), *Lotus japonicus* (NC\_002694), *Nicotiana tabacum* (NC\_001879), *Solanum lycopersicum* (NC\_007898), *Spinacea oleracea* (NC\_002282) and *Arabidopsis thaliana* (NC\_000932) compared to the *M. truncatula* 2HA line. The window is 100 bp, the consensus width is 100 bp and the consensus identity is 70%.
