# Supplementary material for: Two Distinct Plastid Genome Configurations and Unprecedented Intraspecies Length Variation in the accD Coding Region in Medicago truncatula
Source: PubMed Central journal article supplement (PMC4131835; doi:10.1093/dnares/dsu007), 2014-03-17
Supplement: supp_dsu007_dsu007supp_table1.pdf [file supp_dsu007_dsu007supp_table1.pdf]

**Table S1.** Primers to amplify the *M. truncatula* plastid genome fragments

| Primer start | Primer name | Primer sequence               |
|--------------|-------------|-------------------------------|
| 718          | M16A_718F   | TCCTATGGACCCGACGAAGAAAG       |
| 731          | 0.731R      | TCGGGTCCATAGGAATTTCTTTTCAGCC  |
| 1123         | M16A_1123R  | AGCTTGT'TCCACAGCAGGATTAAC     |
| 1130         | 1R          | CAATAATAGCTTGT'TCCACAGCAG     |
| 1235         | 1.235F      | GCGGTTTTTGTAAATTGGGGCATGTTTTG |
| 1258         | 1.2R        | ACATGCCCAATTACAAAAACCGCT      |
| 1717         | 1.717F      | TCCGCAAATAACAAGAGGGCGCAC      |
| 1905         | 1.90-1F     | CATTTGCCGCAATAGGACGTGTGAAC    |
| 1906         | 1.90F       | ATTTGCCGCAATAGGACGTGTGAACC    |
| 1910         | 1.9F        | GCCGCAATAGGACGTGTGAACCA       |
| 2056         | 2.056F      | TCTCAAATAGCCTTGATCATGAGAC     |
| 2257         | M5_2257F    | TTGTTCTGAATCTTTGCACAATCGTTCC  |
| 2293         | M5A_2293F   | ACTAGGAAAAGCCACATACGGCG       |
| 2296         | M4_2296F    | AGGAAAAGCCACATACGGCGAAT       |
| 2296         | M4B_2296F   | AGGAAAAGCCACATACGGCCAAT       |
| 2585         | M4A_2585R   | TGGAACGATTGTGCAAAGATTGAGAACA  |
| 2585         | M4B_2585R   | TGGAACGATTGTGCAAAGATTGAGAACA  |
| 2616         | M4_2616R    | TGGCCGATTTTGACTTTGTACTTTCCA   |
| 3098         | 3.098R      | TCGATGTGAAAGACATTTGTTCTG      |
| 3204         | M6_3204F    | TTGGACAGCATTGAAAGCCTTTTCATTAG |
| 3223         | M5_3223R    | AGGCTTTCAATGCTGTCCAATATCCC    |
| 3228         | 3.228R      | TGAAAAGGCTTTCAATGCTGTCC       |
| 3617         | 3.617F      | GCCGCTATGGTGAAATTGGTAGACACGC  |
| 3680         | M6_3680R    | CGAACCGAGATGCTCTAGCACTGC      |
| 3686         | 3.6R        | CGGACTCGAACCGAGATGCTCT        |
| 3692         | M5A_3692R   | GCTACTCGGACTCGAACCGAGATGC     |
| 3696         | 3.696R      | TGCCGCTACTCGGACTCGAACC        |
| 3696         | 3.696R      | TGCCGCTACTCGGACTCGAACCG       |
| 4262         | 4F          | CTATGCAGCTCTTTTATGtGGATC      |
| 4562         | 4.562F      | ATGGGCTAACGAGGCATGGGGGTC      |
| 4564         | 4.4F        | GGGCTAACGAGGCATGGGGG          |
| 4566         | 4.5F        | GCTAACGAGGCATGGGGGTCCT        |
| 5127         | 5R          | CCTTATACCCGTAATAGGTATTG       |
| 5561         | 5.561R      | AGTGATACTGGGCTCAACGGGGCC      |
| 5805         | M17_5805F   | ATGTGCCCTCTCCGTGGGTATCCG      |
| 6236         | M17_6236R   | TTAGCCACTTTAGCGGCTCAGCC       |
| 6497         | 6.4R        | GTTTTCCCAATAGCCGCAGGTTCTT     |
| 6721         | 6.721F      | TCGGACAAGCGGACTCACACCTC       |
| 7286         | 7.286R      | GCTATCGGACTGGCTATTGTTTCCGC    |
| 7418         | 7.418F      | GGGCTCTAACCATATTTCCGGCTCGTG   |
| 8229         | 8.229R      | TGGATTTGCCTGAAACGCTACACG      |
| 8576         | 8_576F      | TGACATTGGTAAACGGCCCAAAGC      |
| 8875         | 8.875R      | ACATCGGAACGTTTCCGCGGT         |
| 9555         | 9.555F      | AGGTTGACGCCACAAATTCACCC       |
| 9555         | 9.555F      | AGGTTGACGCCACAAATTCACCCC      |
| 9562         | 9.562F      | CGCCACAAATTCACCCCCAAAACC      |

|       |            |                                |
|-------|------------|--------------------------------|
| 9580  | 9.580R     | GGGGGTGGAATTTGTGGCGTCAACC      |
| 9597  | 9F         | TTGCGCATCAACTATATCAACTGTAC     |
| 9702  | 9.7 F      | CTCATAACGGCTCCTGGAAAG          |
| 10523 | 10.523F    | CTCCAATCTTGGGTAAATGTCCTCTTCTC  |
| 10890 | 10R        | GTGTCTTATCAATATCTCTACGTGC      |
| 10918 | 10.918F    | TCGATTGAGCAGCAGCTCGTAGACC      |
| 10919 | S1_10919F1 | CGATTGAGCAGCAGCTCGTAGACC       |
| 10922 | 10.922F    | TTGAGCAGCAGCTCGTAGACCACCC      |
| 10929 | 10_929F    | GCAGCTCGTAGACCACCCAAAAAGG      |
| 10943 | 10.94R     | TGGTCTACGAGCTGCTGCTCAA         |
| 10946 | 10.9R      | GGGTGGTCTACGAGCTGCTGC          |
| 10948 | 10_948R    | TTGGGTGGTCTACGAGCTGCTGCT       |
| 11230 | M7_11230F  | CGGGTCCAATACGCTGTTGTATCCC      |
| 11532 | 11.532F    | ACCAGGTGGACGAATTTTCCATCTCC     |
| 11558 | M7_11558R  | TGGAGATGAAAATTCGTCCACCTGG      |
| 11596 | 11_596F    | AATTCCTCCCTTGGGGGCCTCAAC       |
| 11750 | 11.750F    | GCCACCTGGAATTCCTTCCAAAGC       |
| 11852 | 11.852F    | GCCATTGAACTTCCAATCAAATTCCTC    |
| 11918 | S1_11918F2 | GTATTCGGAAGCCCGAAGCATCG        |
| 11937 | 11.937R    | GTTCGGGCTTCGGAATACAATGG        |
| 11994 | 11_994R    | AGCCGTAGGTGTTGTTGGTAGAGAG      |
| 12217 | 12.127F    | GGGGTTTTGTGCACCAATATCTGCC      |
| 12336 | S1_12336F3 | TCCAATTTGTTCCGGTCCATTTACGG     |
| 12369 | 12.369R    | AGCAATAACCGTAAATGGACCGGAAC     |
| 12706 | 12.706F    | AACGAATTTGTGAATCCCGAATACCC     |
| 12708 | 12.708F    | CGAATTTGTGAATCCCGAATACCCAAC    |
| 12734 | 12.734R    | GTTGGGTATTCGGGATTCACAAATTCG    |
| 12800 | 12.800R    | ACGGCAACGACTACTGTCTTATTTGTC    |
| 12821 | 12.821F    | ACCCCTTTGAGATAAATAGTCTTTTGGGTG |
| 12909 | 12.909F    | TCAACTGATCCGGGGTTTTCTTCTTC     |
| 12932 | 12.932R    | AGAAGAAAACCCCGGATCAGTTGAA      |
| 13461 | 13.461R    | TGGTTTAATACCATAATGGAAGCCATTTT  |
| 13666 | 13_666F    | AGGGACACTGAGGACTTGAAGGAAAGGC   |
| 13777 | 13_777F    | CCAACCCAACTTTTTCGCGTCTTACTC    |
| 13803 | 13_803R    | AGTAAGACGCGAAAAAGTTGGAGTTGG    |
| 13804 | 13_804R    | GAGTAAGACGCGAAAAAGTTGGAGTTGG   |
| 13921 | S1_13921R  | GGACACTGAGGACTTGAAGGAAAGGC     |
| 13962 | 14 F       | CCAGCATTTCTATATCTAGCTCT        |
| 14512 | 14R        | GATTTCTTATAATTACAACATCTCTATCC  |
| 14743 | 14.743F    | AGCCACACGATGTTTCATTGATTCTATTCC |
| 15570 | 15.570F    | TCGATTCCATTTTAACGGGTGATTCCCTC  |
| 15590 | 15.5R      | CACCCGTAAAATGGAATCG            |
| 15883 | 15_883R    | TGAGGGTTTCCAAGAGACCCACT        |
| 16086 | 16_086F    | CGGATACTGGAATGCCCTGATAGGTGC    |
| 16574 | 16_574R    | AGGGATCTATGCGCCCTCTAAGGC       |
| 16574 | 16.574R    | AGGGATCTATGCGCCCTCTAAGGC       |
| 16806 | 16.806F    | ACCATCGAGGAACTTGTTTACTGATTTTCG |
| 16900 | 16_900R    | CGAGGCAATTAGAAGTATCAGAACAACC   |
| 17269 | S1_17269R2 | TCCTTTCTTGAATGGACCTTTTCGTGG    |

|       |             |                                 |
|-------|-------------|---------------------------------|
| 18382 | 18.38-1F    | ATACGGTAGAGTTAGGACAGTGATTGT     |
| 18383 | 18 F        | TACGGTAGAGTTAGGACAGTGATTG       |
| 18384 | 18.38F      | ACGGTAGAGTTAGGACAGTGATTGTATG    |
| 18418 | S2_18418F   | AATCAAAGCCAAATGCAAAGGCGC        |
| 18493 | 18.493F     | TGCTGCTATTTCCGTCTCGGTCCC        |
| 18532 | 18_532R     | CCGGTTATGGACAAAGGGACCGAG        |
| 19340 | S2_19340R   | GCCTCATTTTCATAGGTAAATTCAAAGTGGC |
| 19442 | 19.44-1R    | CCGCTCTACCACTGAGCTACTGAGGA      |
| 19444 | 19.44R      | GACCGCTCTACCACTGAGCTACTGAG      |
| 19449 | 19_449R     | CAGCCGACCGCTCTACCACTGAG         |
| 19450 | 19R         | ACAGCCGACCGCTCTACCAC            |
| 19584 | M20_19584F  | ACGGTTACCCCTGTCATTGTTTC         |
| 19651 | M29_19651F  | TGGAGACTCGCGGTCAATACC           |
| 19980 | M20_19980R  | GTGGAAGCAAAGCTATGGAACCTAGC      |
| 20121 | 20.121R     | AGACTGGGTGGGGCCTGTAGCTC         |
| 20574 | M29_20574R  | GGCAGAGGCCTTTGGTGTCC            |
| 21754 | 22F         | CGCTACCTTAGGACCGTTATAGTTAC      |
| 22969 | 23R         | GAAACTAAGTGGAGGTCCGAACCGAC      |
| 24524 | M30_24524F  | TCTGACCAACCGCCCATCCTAC          |
| 24828 | 24.828F     | TGGACTTGAACCAGAGACCTCGCCC       |
| 25330 | 25F         | AtAGAAAGTTGGATCTACATTGGATC      |
| 25472 | M8_25472F   | CAGGCGCCGATGAGCACATTGAAC        |
| 25537 | M30_25537R  | GTCGTTGTGCCTGGACTGTGAG          |
| 25538 | M8A_25538F  | GCAATTATCAGGGGCGCGCTCTACC       |
| 25926 | M8_25926R   | GGTAGCCGTAAGGAGGTGCGAC          |
| 25938 | 25.938F     | TCACTCCAGTCACTAGCCCTGC          |
| 25949 | 25.949F     | ACTAGCCCTGCCTTCGGCATC           |
| 25951 | 25.951F     | TAGCCCTGCCTTCGGCATCC            |
| 25972 | M8A_25972R  | GGGGATGCCGAAGGCAGGGCTAG         |
| 25987 | 25.987F     | GGTAACGACTTCGGGCATGGCC          |
| 26687 | 26R         | CGACACTGACACTGAGAGACGAAAGC      |
| 27211 | M31_27211F1 | TAGCAGCCGTTTCCAGCTGTTG          |
| 27700 | 27.70F      | TCGAACCGATGACTTCCACCACG         |
| 27723 | 27.723R     | ACGTGGTGGAAATCATCGGTTTCG        |
| 27751 | M28_27.751F | ACCCCTTCCCTTGCCCTATC            |
| 28115 | M31_28115R  | TCGCAAATGGTAAGATCGTTGGC         |
| 29090 | M28_29.090R | TCACCTCATAACGGCTCCTCG           |
| 29191 | 29.2F       | TGCCAGAGTACGCTTAACCTCTGG        |
| 29223 | 29F         | TCACTGCTTATATAACCCGGTATTGGC     |
| 29367 | 29.367R     | TGGCGATCCTTTACTCCGACAGC         |
| 29465 | 29.465R     | CATCGCCACTCCCTTTGGCAG           |
| 29863 | 29.863R     | TCGCCACTCCCTTTGGCAGCATCC        |
| 29880 | 29.880R     | GCTTTTTGCGTATGGCATCGCC          |
| 29922 | 30R         | GTGCAAAGCTCTATTTGCCTCTGCC       |
| 33211 | 33F         | GGAACAGATAGTAACAACCATCTCC       |
| 33224 | 33.22F      | ACAACCATCTCCTCCGGGAAAAGCCA      |
| 33227 | 33.2F       | ACCATCTCCTCCGGGAAAAGCC          |
| 34086 | 34R         | GATCTAGTTCATGGCCTATTAGAAGT      |
| 34177 | 34.16R      | CGGATCCGTGCTCAAAACCTTTGG        |

|       |            |                                   |
|-------|------------|-----------------------------------|
| 34182 | 34.1R      | TCTGCCGGATCCGTCGCTCA              |
| 34189 | 34.18-1R   | GAGTTGTTCTGCCGGATCCGTCG           |
| 36266 | M22_36266F | CTAATATCATGAAAAATGGATACAAATTCT    |
| 36395 | M22_36395R | AATTGTTACTTACCCGGACAGG            |
| 37651 | 37F        | ATGTTGGTTGATCGTGTATTTCCCTTG       |
| 38345 | 38.3R      | ATCCTACAAGAGCCGGCCGGT             |
| 38444 | 38R        | GATACAGGAGCGAAACAATCAACTta        |
| 38654 | S3_38654F  | CGATTGCC'TTTTGCGTGAAAGTACG        |
| 39083 | S3_39083R  | GCCATGGATGCTTCGTGGGAATCC          |
| 39095 | M1A_39095F | AGCGCCCAACTCATAATTGGCG            |
| 39143 | M1B_39143F | TGCACGCCAATAGAACCCTACCTCC         |
| 39155 | M1_39155F  | GAACCCTACCTCCCATAAAGTC            |
| 39469 | M1A_39469R | TGACAGATGGTCAGAACTTCGTCTCG        |
| 39472 | M1B_39472R | CTCTGACAGATGGTCAGAACTTCGTCTC      |
| 39503 | M1_39503R  | CCATTGATACAGAGCCAATCGG            |
| 41324 | 41F        | TGGGGTTATCCTGCACTTGGAAG           |
| 42332 | 42R        | AGTCTGAAACCAAGCGGATGTATT          |
| 45005 | 45F        | TCACTAAAATAGTTTCATTAGCACCCG       |
| 45005 | S4_45005F  | TCACTAAAATAGTTTCATTAGCACCCGAGG    |
| 45790 | S4_45790R  | TTTTTCGATTCATGTCAGCATTGCGTATC     |
| 46111 | 46R        | TTCCGCCCGGATTC'TTTTCTAATC         |
| 49091 | 49F        | ATTATGACCCATCCCTTTAGCC            |
| 49095 | 49.09F     | TGACCCATCCCTTTAGCCAATTTTCGC       |
| 49892 | S5-49892F  | TTCCGGAGAGTTCATTCAACTATTCGTG      |
| 50131 | 51R        | GCACTTTCCAATGATACGTAAGC           |
| 50131 | 50.13R     | GCACTTTCCAATGATACGTAAGCAAGGC      |
| 50220 | S5_50220R  | AGCGCTAGTGTGGGACAATCTACC          |
| 52000 | 52.000F    | CTGCTTTTGGGCAACCCTCTCAAC          |
| 53061 | 53F        | AGTATCCCTGATCCCATTGATAACG         |
| 53252 | 53_252F    | TGGAAAAGGCCCGCTAATATGCC           |
| 53761 | 53.761R    | TCCCTCTGACCCTGTTCTTGACCC          |
| 53891 | 53R        | TGCCTTGGTATCGTGTTCATAC            |
| 53969 | M9_53969F  | GGACCTTCCCCTTTTAGTAAATTATCTCGC    |
| 54309 | M9_54309R  | CTTTGGAGTGAGAACGTAAGGAGACAG       |
| 54343 | 54_343F    | ATGCCAATTGGTGTTC'AAAAGTACCC       |
| 54796 | M3_54796F  | CGAGTTCGATATGCAAACTTATTATTTTTC    |
| 54914 | M3_54914R  | GTGACACTAAAATAGAGTATTTTATTTATATAA |
| 54921 | S6_54921F  | TTTTTGCTTTTCGTTTTTCATAGCAGAGAC    |
| 55438 | 55.438F    | TGCACAAAGAACAGGCAAAGCTTC          |
| 55505 | 55.505F    | GCAGAAGAAGCTGAAGCCCACGG           |
| 55505 | 55_505F    | GCAGAAGAAGCTGAAGCCCACGGA          |
| 55528 | 55.528R    | TCCGTGGGCTTCAGCTTCTTCTGC          |
| 55937 | 55.937R    | GAACGTATGTTGGAATGATAACATAAC       |
| 55964 | 55.964F    | CGGAATCGTATGAATAAACAATTTGTTAG     |
| 56346 | 56.346R    | CCATTATCATTATATGAATGGTAGAATAC     |
| 56890 | 57F        | ATTAGAAACACAAGACAGCCAAT           |
| 56973 | S6_56973R  | AGTACATGTTCC'TCGGCGCTGAG          |
| 57758 | S7_57758F  | TACATCAAGCTTTTCGCGGAGCTC          |
| 57759 | 57.759F    | ACATCAAGCTTTTCGCGGAGCTCATTC       |

|       |                      |                                |
|-------|----------------------|--------------------------------|
| 57759 | 57.7F                | ACATCAAGCTTTCGCGGAGCTCA        |
| 57821 | 57.8F                | AGCTTTGGTTTCGGCTCATCGGG        |
| 57821 | 57_821F              | AGCTTTGGTTTCGGCTCATCGGG        |
| 57844 | 57_844R              | TCCCGATGAGCCGAAACCAAAGC        |
| 58046 | 58.046R              | CTCCTTGGCAATCATAAAAAGACAATTCCC |
| 58118 | 58.118F              | TAAAATAGAATTCATATGATAAAGTTATC  |
| 58202 | 58.202F              | TTTCTTACAACGCAACATCCTCAATAGG   |
| 58493 | 58R                  | CAAGCTCGTATTTTATCTTTGTTACC     |
| 58549 | 58.549R              | GACGCGTGAATAGATCAACCTTAAAACAAC |
| 58917 | 58_917F              | TCTCGACGTGAATCGTATGTTTGCAAC    |
| 59096 | 59.096F              | CCCTTGGCCATGAACCTCCTTTGG       |
| 59713 | 59.713R              | ATGGTTCGCGGTCTTAGCAGGTC        |
| 59733 | 59.733R              | GCACCGGTGGCAAGTACTCTATGG       |
| 59746 | 59_746R              | ATATCTCTCTGTGGCACCAGGTGGC      |
| 60405 | 60_405F              | GGTCTCCAAAACCCGATGTCGTAG       |
| 60424 | 60_424R              | GACATCGGGTTTTGGAGACCCGC        |
| 60637 | S7_60637R            | ATACCGACGTGGTGATCAGTTGG        |
| 60945 | 60_945R              | AGCAGTTTTAACAATAACCGCGGGTC     |
| 62010 | 63.01F (is at 62010) | ACAAAATGTTGAATTGAATCGTACCAGTC  |
| 62020 | 62F                  | GAATTGAATCGTACCAGTCTCTAC       |
| 62020 | 62_020F              | GAATTGAATCGTACCAGTCTCTACTGGGG  |
| 62020 | 62F                  | GAATTGAATCGTACCAGTCTCTAC       |
| 62024 | M23_62024F           | TGAATCGTACCAGTCTCTACTGGG       |
| 62354 | M23_62354R           | GGATGATCCCAATCCGGAATATGAACC    |
| 62463 | 62_463R              | GGAAGAACTCAACAGGACCCCTCG       |
| 63463 | 62R                  | GGCATCTATTATTTTGGCACAAATC      |
| 63471 | S8_63471F            | ACAACAGACCTTGTACACGTAACGG      |
| 63538 | 63_538R              | GGGTGGATTTGGTCAGGGGGATGC       |
| 63540 | 63.5R                | GTGGGTGGATTTGGTCAGGGGG         |
| 64113 | 64.113F              | CGGGAAGTACCGCTTGTGGAACC        |
| 64299 | 64.299R              | ACCCGATCCATTTCCGTATTGCTC       |
| 64922 | 64.922F              | GGATACGGTCTTGGTTGTTTCGTCTCG    |
| 65187 | 65.187R              | AGTCTTTTTGCCCTGGTGCATCTC       |
| 65900 | 65.900R              | AGGTCTCTTTCTAAGTTTACATTGGTGGC  |
| 66388 | 66F                  | AGAAGCCATTGCAACTGCCGAAA        |
| 66388 | 66.3F                | AGAAGCCATTGCAACTGCCGGA         |
| 66398 | 66.398F              | GCAACTGCCGAAATACTAGGCCAC       |
| 66424 | 66.424R              | AGTGGGCCTAGTATTTCCGGCAG        |
| 66820 | S8_66820R            | ACACATGTTTCTTGTAGAAATAGAGGGCA  |
| 67295 | 67R                  | GGAAGTTTGAGCTTAATGCAAATGG      |
| 67299 | 67.29R               | AGAAGGAAGTTTGAGCTTAATGCAAATG   |
| 67382 | 67.382F              | TCTCACCCACTACGGATCCCATAC       |
| 67529 | 67.529F              | GATAATCATCATTTTCAGAAGGTTTCGTC  |
| 67534 | S9_67534F            | TCATCATTTTCAGAAGGTTTCGTTTCG    |
| 67977 | 67.977F              | TCCATAACAACGTGTCGAGGCAAC       |
| 67988 | 67.988F              | TGTCGCAGGCAACCCACAAATG         |
| 68014 | 68.014R              | TTTCGCATTTGTGGGTTGCCTGC        |
| 68241 | 68.241R              | CCAAAAGGCTAGTGACATTTTAGAACCG   |
| 68665 | 68.665F              | TCCTCCTCCTGCGGATTATTCTCATTG    |

|       |             |                                       |
|-------|-------------|---------------------------------------|
| 68689 | 68.689R     | ATGAGAATAATCCGCAGGAGGAGG              |
| 68745 | 68.745R     | GGTTATATGCTTTCTGAAATCGGTATTGATAGTTCCA |
| 69044 | S9_69044R   | AGGGGTTTAGAATACAGGTGTGGTTTAAG         |
| 69421 | S10_69421F  | ACCTGGGACGGAAGGATTCGAACC              |
| 69482 | 69.482R     | AAGCGGTAAGGCGACGGGTTTTGG              |
| 70253 | 70.253F     | TCTTAGCTTTTGTGGCAAGCTGCTG             |
| 70257 | M10_70257F  | AGCTTTTGTGGCAAGCTGCTG                 |
| 70261 | 70 F        | TTTGTGGCAAGCTGCTGTAAG                 |
| 70511 | S10_70511R  | GGTATTGGTGGTGGACTCCAATCG              |
| 70511 | M10_70511R  | GGTATTGGTGGTGGACTCCAATCG              |
| 70815 | 70.815R     | TTCACGTCCAGGATTACGTCTGG               |
| 71002 | 71R         | CGAATCCCTCTCTTCCG                     |
| 71041 | 71.041F     | CCGCCGCTTAGTCCACTCAGC                 |
| 71062 | 71.0R       | GCTGAGTGGACTAAAGCGGCGG                |
| 72027 | 72.827R     | TGGGGAAGCAGAAGCCTTTTG                 |
| 72164 | S11_72164F  | TCCAAGCTAACGATGCGGGTTCG               |
| 72834 | S11_72834R  | CATTCACTGGGGAAGCAGAAGCCC              |
| 73176 | 73 F        | CCaACTCTGGAACGGAAATACCC               |
| 73416 | 73.4F       | TACGCTTCGCGACCTGGTGG                  |
| 73868 | 73.868F     | ACCGGGAGCGGGAGATTCGATTAACC            |
| 73938 | M24_73938F  | GCTAGGGCATTTACAACACGACCC              |
| 74164 | 74R         | GGCATTGCTCGTATTtAtGGTCTTG             |
| 74177 | 74.177R     | TCAAGTAGGCGACGGCATTGCTCG              |
| 74177 | M24_74177R  | TCAAGTAGGCGACGGCATTGCTC               |
| 74513 | 74.513F     | TCGCCCTTTGTTGTTCAAAATGAATCG           |
| 75447 | 75.447F     | ACAACTCGCACACACTCCCTTTC               |
| 75570 | 75.570F     | TTCCGGCGGATGGCCAGTAAATG               |
| 75573 | 75.573R     | TGCTTCATTTACTGGCCATCCGCC              |
| 75992 | 75.992R     | TTATTTAGTCCAACGAGCGCCCC               |
| 76015 | 76.015R     | TGGATTCGCCTTCTCCGTCCC                 |
| 76290 | 76.290R     | GCGCGACAACCGGAAGCAGAGGAC              |
| 76308 | 76.308F     | GCCCTGCAGCTGTACCTTGACC                |
| 77424 | 77.42F      | CAATGATGGCCTTCCATGGATTACCC            |
| 77428 | 77F         | GATGGCCTTCCATGGATTACCC                |
| 77473 | 77.473R     | GCTACCTTAGCTGCGGCTTATATAGGTG          |
| 77839 | 77.839R     | TGGTCAGGGGCTTTTTGCCTTGG               |
| 78946 | 78R         | CTGCTCGTTTTTATCAGAAGTTTGTG            |
| 79473 | 79.4R       | TGCACCGTTCACGGTCAAGGC                 |
| 79479 | 79.47R      | GAATAATGCACCGTTCACGGTCAAGG            |
| 79705 | 79.705R     | AGAACGAACGGGCGTGCCTTG                 |
| 82013 | 82 F        | CCTGCACGACTTTCCTGATAAG                |
| 83013 | 83R         | GAGGATTAATGTCAGATCCACAAGG             |
| 86445 | 86.445F     | AGGAGAACTGATCCAATTCGAAGGTG            |
| 86752 | 86.7F       | CCTCGAGCGCCAAACCTCC                   |
| 86752 | 86.75F      | CCTCGAGCGCCAAACCTCCATTTCC             |
| 86805 | 86F         | CTTCCTTAAGGGGTTGTTGTG                 |
| 87780 | 87.780F     | CCCAAAGCGAGTTCACCGCCAAC               |
| 87978 | S13_87978F1 | TTTCCGGCGTGTTCGGCTATAGC               |
| 88103 | 88R         | GAGTTCATAATGCAACGTCAAGC               |

|       |             |                                 |
|-------|-------------|---------------------------------|
| 88515 | 88.515F     | CTAGCAGTTCGCCCCGTCAATCC         |
| 88845 | 88.845F     | TTCATTCCAATCAAATGATCCGCAGC      |
| 89354 | 89.354R     | GCAAAGCCCTGGTATCTATTATCGTTC     |
| 89488 | 89.488R     | TCCGCGGGATTAATTTGGAAAAACAG      |
| 89645 | S12_89645F  | GCCCCGATCAATGAATCTACAAAACCC     |
| 89649 | 89F         | CGATCAATGAATCTACAAAACCC         |
| 89707 | 89_707F     | ACATTCCTTCATTCCCAACCCCAAGC      |
| 89711 | 89.7F       | TCCTTCATTCCCAACCCCAAGCA         |
| 89846 | 89.846F     | CTGAATCACATGAAATTTTACCTAACGACG  |
| 90065 | 90.065F     | AAATGAATTCAGGATTTGTTTGGCTCC     |
| 90069 | 90.069F     | GAATTCAGGATTTGTTTGGCTCCATGAG    |
| 90256 | 90.256F     | TGCAGTCCATTTGTTTCGGGACAGC       |
| 90281 | S12_90281R  | TGCTGTCCCGAACAAATAGGACTGC       |
| 90422 | 90.422R     | ACAGCAACTGTTAATATATGTCAACCCC    |
| 90808 | S15_90808F  | CGATATGGCCGAGTGGTAAGGCG         |
| 90819 | 90.819F     | AGTGGTAAGGCGGGGACTG             |
| 90825 | 90.825F     | AAGGCGGGGACTGCAAATC             |
| 90832 | 90.832R     | CCCGCCTTACCACTCGGCCATATC        |
| 90835 | 90.8R       | TCCCCCGCCTTACCACTCGG            |
| 90852 | 90_852F     | CCAGTTCAAATCCGGGTGTCGCC         |
| 90941 | S14_90941F1 | CCAGCACAAGCTAGTGTAGGAATAAGGG    |
| 90954 | sat_90_954F | GTGTAGGAATAAGGGACTAGTTTGTATGC   |
| 91182 | 91.182R     | ATTCCCCATCCGAGCTATCC            |
| 91187 | S13_91187F2 | GTCCATTTTAAGTTAGGGAAGGTGTTGAAG  |
| 91506 | S15_91506R  | CCATTTGATTGTCTCCCGATTCGTTC      |
| 91616 | S14_91616F2 | GGATGTTTCGTCAATGGTGTATGACGG     |
| 91619 | 91.619F     | TGTTTCGTCAATGGTGTATGACGG        |
| 91674 | 91.674R     | GGAATCGCTGGTACAGAGTC            |
| 91812 | 91.812F     | GTCTTGCTTGGGCTGGTTTAAATGGT      |
| 91824 | 91R         | GCCCAAGCAAGACTTACTATATCCAT      |
| 91828 | 91.82F      | ACCAGCCCAAGCAAGACTTACTATATCC    |
| 91839 | 91.839R     | ACTACCATTAAACCAGCCCAAGCAAGAC    |
| 91857 | 91.857F     | CCCTTGTAGTATGGGGAAGAAGTGGA      |
| 92122 | 92.122R     | TTCCCGGGACAATAAGATGGGAAC        |
| 92826 | 92_826F     | AAGGCAGTAGGAAC TAGAATGAAGAGTGC  |
| 92855 | 92_855R     | TGCACTCTTCATTCTAGTTCCTACTGCC    |
| 92873 | 92.873R     | TCTCGCATTTATAGCTACTGCACTC       |
| 92879 | 92.879R     | CAATATTCCTCGCATTTATAGCTACTGC    |
| 92981 | 92.981R     | ACCCTGAATTTACTGACGAAAGATT       |
| 93179 | S13_93179R  | GTTTAAAGGTAAAGGTTCCGACGAAGAAAG  |
| 93318 | 93.318R     | GGAAGCTGCGGGTTCGAGTC            |
| 93329 | 93_329R     | CCTGTCAAGGCGGAAGCTGCGGG         |
| 93330 | 93.330R     | CCCTGTCAAGGCGGAAGCTG            |
| 93523 | S14_93523R  | TGCGAATAATCCGTGTGATCTCGC        |
| 93905 | 94F         | AAGTCGAATCCCCGTTGCCTC           |
| 94321 | sat_94_342R | AAACCGATTTCGAATTGAAATCATCTTCATC |
| 94597 | 95R         | TACCCTGAGTTAAAGGGGC             |
| 95151 | M11A_95151F | TCCACGCAGAAGGGTTTATTCTAAGTTCC   |
| 95165 | 95.165R     | ACCCTTCTGCGTGGAGAAGAGGAG        |

|        |              |                               |
|--------|--------------|-------------------------------|
| 95703  | M11_95703F   | GAGTAGTCTGTCTGGGGATCTGCTGG    |
| 95963  | M11_95963R   | CTGTCCCTTCTTTTCTACTGGGTTTCG   |
| 96214  | M11A_96214R  | CCCACGGCAAAATAGGCGCAAGG       |
| 96215  | 96.2R        | CCCCACGGCAAAATAGGCGC          |
| 96352  | S16_96352F   | TATGGGGTCTGAAGCACAGGGAG       |
| 96718  | 96_718R      | TGAATAGCGCATAGTAGGGCAGCGC     |
| 98774  | 98F          | GTTTTCAAGACCGGAGCTATCAAC      |
| 98781  | 98.78F       | AGACCGGAGCTATCAACCACTCAGCC    |
| 98868  | S16_98868R   | TCGTATGGTCATGTTCTCTTGAGTGG    |
| 99946  | 100R         | AACCCGCGTCTTCTCCTTGG          |
| 99947  | 99.94R       | GAACCCGCGTCTTCTCCTTGGCAAG     |
| 102995 | 103F         | AAGAATGCCACGTTGTGGC           |
| 103262 | M12A_103262F | GCCTGCGCCCATAAGAAATCGCGG      |
| 103265 | M25_103265F  | TGCGCCCATAAGAAATCGCGGAG       |
| 103266 | M12_103266F  | GCGCCCATAAGAAATCGCGGAGC       |
| 103521 | M25_103512R  | CGGTTCCCTTGTGATGGACCTGG       |
| 103731 | M12_103731R  | CCTGGTGCAACAGCAAGCACCAG       |
| 103748 | M12A_103748R | CACCTGGTACAACGGCCCCCTGGTG     |
| 104282 | 104R         | GGGGTATTGGTCATGGTATAAGAG      |
| 105399 | S17_105399F  | TGATCCGGAAGTTAATCCGGGGC       |
| 105927 | S17_105972R  | ACAAGCTATAGCCCTTACCCCTGGG     |
| 106839 | 106.8F       | AGGGTTTCGTTTCGAGTGCCCT        |
| 107731 | 107F         | CCATCTCTGTAATAAGTGAATGCC      |
| 107979 | S18_107979F  | CCTACGGCAGGCCTCGAAGTAAG       |
| 108113 | 108R         | AACCACTCGCCATCTCTCCTA         |
| 108527 | 108.527F     | GGATTGGCAATTTTTTCGCGGGGG      |
| 108715 | S18_108715R  | TGGCTTCGACTATTCCTCAAGCCCG     |
| 108788 | S19_108788F1 | TCGCTTTTCCAGCGATACGAACG       |
| 108990 | S19_108990F2 | ACGAGGCCCTCTGTAACGTGACAT      |
| 109384 | S19_109384F3 | AACCTCTGAGCTAAGCGGGCTCTC      |
| 110650 | 110F         | CGAAAtGGTAGACGCTACG           |
| 110670 | S19_110670R  | CCGTAGCGTCTACCAATTTTCGCC      |
| 111894 | 111.894R     | AGTTGGATAGGATGGCCTTTGCG       |
| 112789 | 112R         | GTTATTGCTATGGGAGCCTG          |
| 112898 | 112.8R       | ACGGTCGAGTCCTAGGCAGGC         |
| 114808 | 114F         | GAGTCATTGGTTCAAATCCAATAG      |
| 114965 | M26_114965F  | AGATCCTATTGATAGCCTCTACTCGGGTC |
| 115163 | 115R         | GCTAGAATAGGAAATAATGAGATCAC    |
| 115178 | 115.17R      | CTGATGGGCGGTTTTTGCTAGAATAGG   |
| 115189 | M26_115189R  | GTAACGATGGCTCTGATGGGCGG       |
| 116601 | 116.601F     | CCTCTCTTTAGACCATCTGTAGCACTC   |
| 116688 | 116.688F     | ATTTCTTGGCCAACAGTATCTCG       |
| 117033 | 117.033R     | TGGTTGGGTGGTACCAAGAAAATCG     |
| 117587 | 117.587R     | GCAACAACAAGGTCTACTCGACATAAC   |
| 117652 | 117.652R     | CGTTGCTTTAGTTTCTGTTTGTGGTGAC  |
| 118864 | 118.8F       | ACCTGGTGCCGTAGCGAATCG         |
| 118906 | 118F         | ACAAGCTCGTAATGAAGGACGTG       |
| 118990 | M27_118990F  | TGCTGCTTGTGAAGTCTGGAAGG       |
| 119446 | M27_119446R  | TGAGTCAATCCATCCTTTTATTACGATC  |



|        |             |                               |
|--------|-------------|-------------------------------|
| 120129 | 120.129F    | CCAAAATCAAAGAGCGATTGGTCC      |
| 120341 | 119R        | TCAAATGATACATAGTGCATACA       |
| 122149 | M13 122149F | TAGTTCGGGTTCGAGTCCCGG         |
| 122158 | 124F        | GTCGAGTCCCGGCAAC              |
| 122662 | M13 122662R | CTGGAGGAGCTGCGATGAAAGCG       |
| 123520 | 123.5F      | GCTGCGGTCGAGGCTCCATC          |
| 123628 | 123.628F    | ACTCCCCCTTTTACTTTTTGTTAGTAGTC |
| 124027 | 124.027R    | GGCGAATGACGGGAATTGAACCC       |
