# Supplementary material for: Two Distinct Plastid Genome Configurations and Unprecedented Intraspecies Length Variation in the accD Coding Region in Medicago truncatula
Source: PubMed Central journal article supplement (PMC4131835; doi:10.1093/dnares/dsu007), 2014-03-17
Supplement: supp_dsu007_dsu007supp_table2.pdf [file supp_dsu007_dsu007supp_table2.pdf]

**Table S2.** PCR amplicons for Illumina library preparation

|                                                                                                                                                                                                                                                                                               |                                                                                                                                                                                                                                                                                                               |                                                                                                                                                                                                                                                                                                                           |                                                                                                                                                                                                                                                                                                                                                                                                                                                                                                                         |
|-----------------------------------------------------------------------------------------------------------------------------------------------------------------------------------------------------------------------------------------------------------------------------------------------|---------------------------------------------------------------------------------------------------------------------------------------------------------------------------------------------------------------------------------------------------------------------------------------------------------------|---------------------------------------------------------------------------------------------------------------------------------------------------------------------------------------------------------------------------------------------------------------------------------------------------------------------------|-------------------------------------------------------------------------------------------------------------------------------------------------------------------------------------------------------------------------------------------------------------------------------------------------------------------------------------------------------------------------------------------------------------------------------------------------------------------------------------------------------------------------|
| <i>M. truncatula</i> cv.<br>Jemalong line 2HA<br><u>Primer pairs</u><br>118.8F/1.2R<br>110F/3.6R<br>124F/10.9R<br>4.4F/10.9R<br>9.7F/15.5R<br>14F/19R<br>18.38F/34.16R<br>33.22F/50.13R<br>49F/58R<br>53F/71R<br>70F/88R<br>77F/88R<br>86.7F/91R<br>89.7F/96.2R<br>94F/100R<br>98.78F/115.17R | <i>M. truncatula</i> cv.<br>Paraggio<br><u>Primer pairs</u><br>118.8F/1.2R<br>110F/3.6R<br>124F/10.9R<br>9.555F/11.994R<br>-<br>13.777F/16.574R<br>16.806F/18.532R<br>18.38F/34.16R<br>33.22F, 50.13R<br>49.09F/67.29R<br>62F/74R<br>70F/88R<br>77F/88R<br>-<br>92.826F/96.718R<br>94F/100R<br>98.78F/115.17R | <i>M. truncatula</i> cv.<br>Borong<br><u>Primer pairs</u><br>118.8F/1.2R<br>110F/3.6R<br>124F/10.9R<br>9.555F/11.994R<br>-<br>13.777F/16.574R<br>16.806F/18.532R<br>13.777F/18.532R<br>18.38F/34.16R<br>33.22F, 50.13R<br>49.09F/67.29R<br>63.01F/79.49R<br>70F/88R<br>-<br>92.826F/96.718R<br>94F/100R<br>98.78F/115.17R | <i>M. truncatula</i> cv.<br>R108<br><u>Primer pairs</u><br>1.9F/10.9R<br>9.555F/11.994R<br>-<br>16.867F/18.532R<br>18F/23R<br>22F/26R<br>25F/30R<br>29F/34.1R<br>33.2F/38.3R<br>37F/42R<br>41F/46R<br>45F/51R<br>49F/53R<br>53.252F/55.528R<br>54.343F/57.844R<br>-<br>60.405F/63.538R<br>62F/71.0R<br>66.398F/69.482R<br>70F/74R<br>73F/78R<br>77F/83R<br>82F/88R<br>86.7F/91R<br>89.7F/96.2R<br>94F/100R<br>98F/104R<br>103F/108R<br>106.8F/112.8R<br>110F/115R<br>114F/119R<br>118.8F/1.2R<br>124F/3.6R<br>1.9F/6.4R |
|-----------------------------------------------------------------------------------------------------------------------------------------------------------------------------------------------------------------------------------------------------------------------------------------------|---------------------------------------------------------------------------------------------------------------------------------------------------------------------------------------------------------------------------------------------------------------------------------------------------------------|---------------------------------------------------------------------------------------------------------------------------------------------------------------------------------------------------------------------------------------------------------------------------------------------------------------------------|-------------------------------------------------------------------------------------------------------------------------------------------------------------------------------------------------------------------------------------------------------------------------------------------------------------------------------------------------------------------------------------------------------------------------------------------------------------------------------------------------------------------------|
