# Supplementary material for: Two Distinct Plastid Genome Configurations and Unprecedented Intraspecies Length Variation in the accD Coding Region in Medicago truncatula
Source: PubMed Central journal article supplement (PMC4131835; doi:10.1093/dnares/dsu007), 2014-03-17
Supplement: supp_dsu007_dsu007supp_table3.pdf [file supp_dsu007_dsu007supp_table3.pdf]

**Table S3.** Jemalong A17 PCR probes to detect ptDNA inversion in the 2HA and R108 ptDNA

|         | Primer  | Primer sequence               | Primer | In R108 | 2HA/bp | R108/bp |
|---------|---------|-------------------------------|--------|---------|--------|---------|
| Probe 1 | 11.852F | GCCATTGAACTTCCCAATCAAATTCCTC  | 11852  | 11892   | 518    | 518     |
|         | 12.369R | AGCAATAACCGTAAATGGACCGGAAC    | 12369  | 12409   |        |         |
| Probe 2 | 14 F    | CCAGCATTCTATATCTAGCTCT        | 13962  | 56730   | 551    | 523     |
|         | 14R     | GATTTCTTATAATTACAACATCTCTATCC | 14512  | 56208   |        |         |
| Probe 3 | 57F     | ATTAGAAACACAAGACAGCCAAT       | 56890  | 14483   | 955    | 961     |
|         | 57_844R | TCCCGATGAGCCGAAACCAAAGC       | 57844  | 13523   |        |         |
| Probe 4 | 59.096F | CCCTTGGCCATGAACCTCCTTTGG      | 59096  | 58491   | 638    | 617     |
|         | 59.733R | GCACCGGTGGCAAGTACTCTATGG      | 59733  | 59107   |        |         |
